# Supplementary material
Source: PubMed Central journal article supplement (PMC8643072)

# SFigure 1

**A. WGS Metagenome**

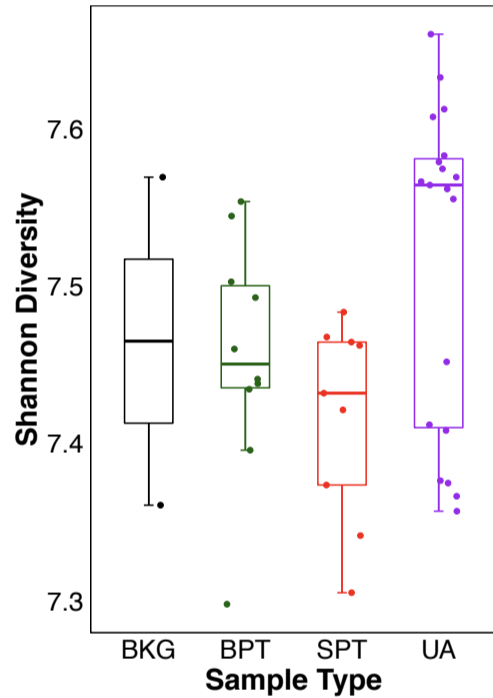

**B. RNA Metatranscriptome**

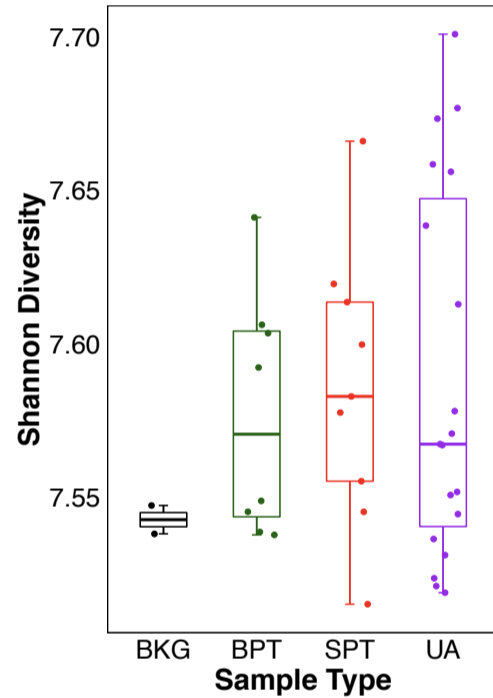

# SFigure 2

## Rarefaction Analysis

### A. 16S

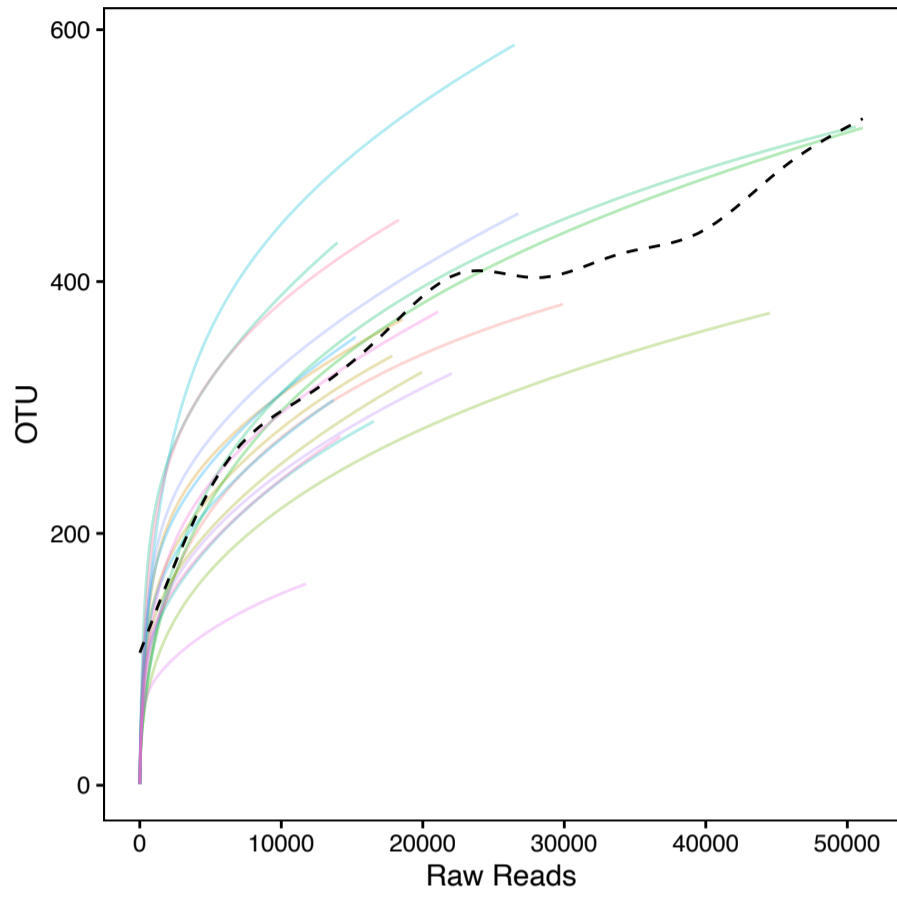

### B. WGS

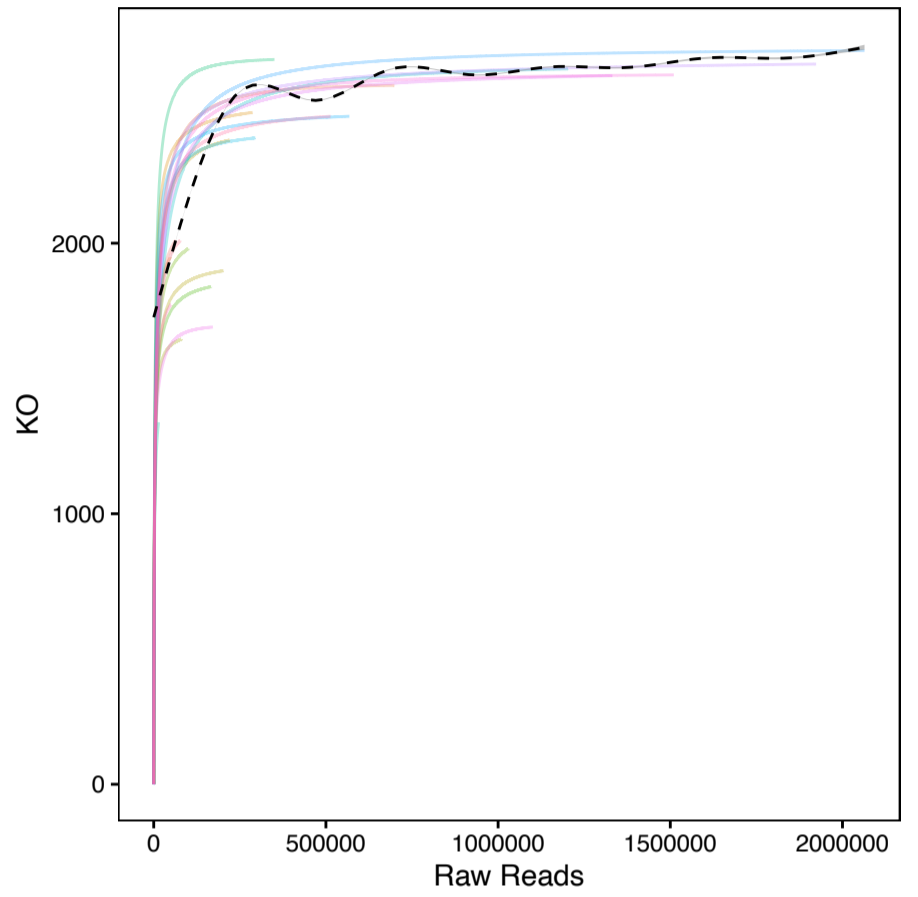

### C. RNA

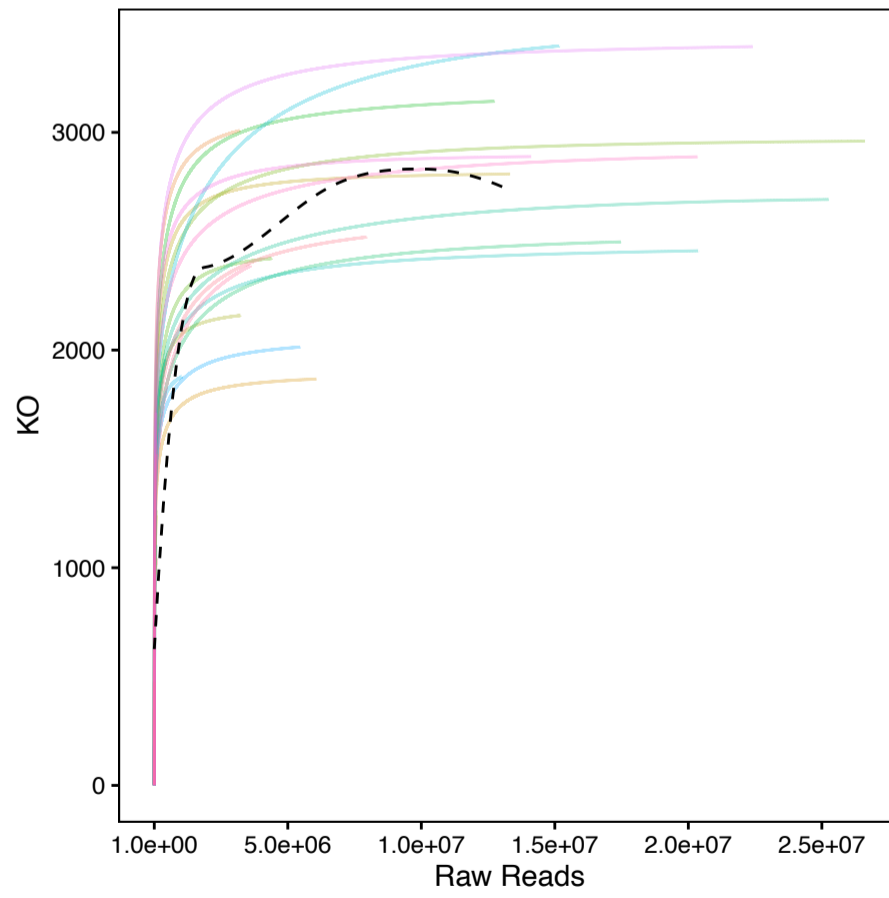

# SFigure 3

## Taxonomic Annotation

### A. 16S vs. WGS

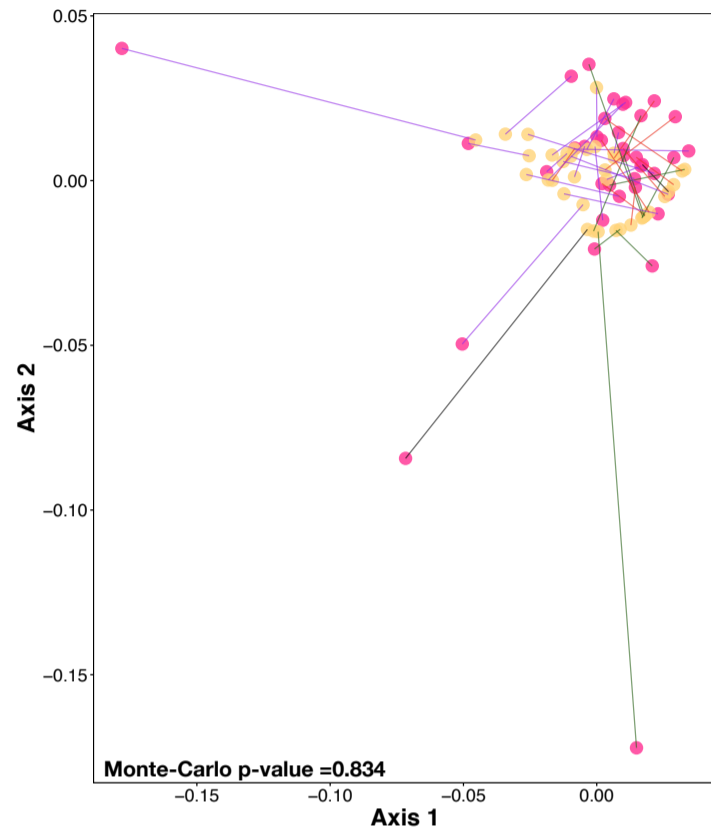

### B. 16S vs. RNA

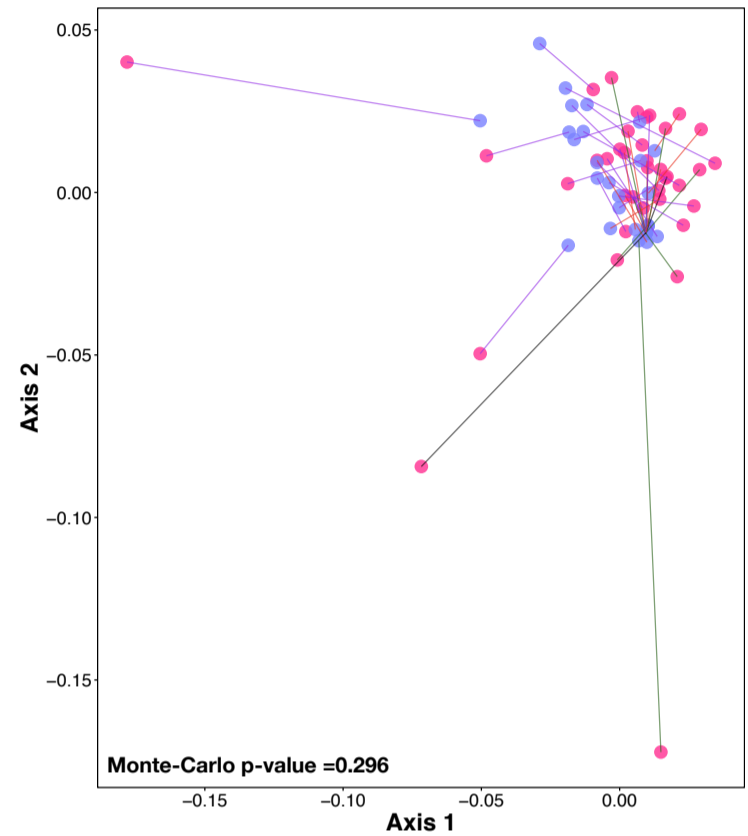

### C. WGS vs. RNA

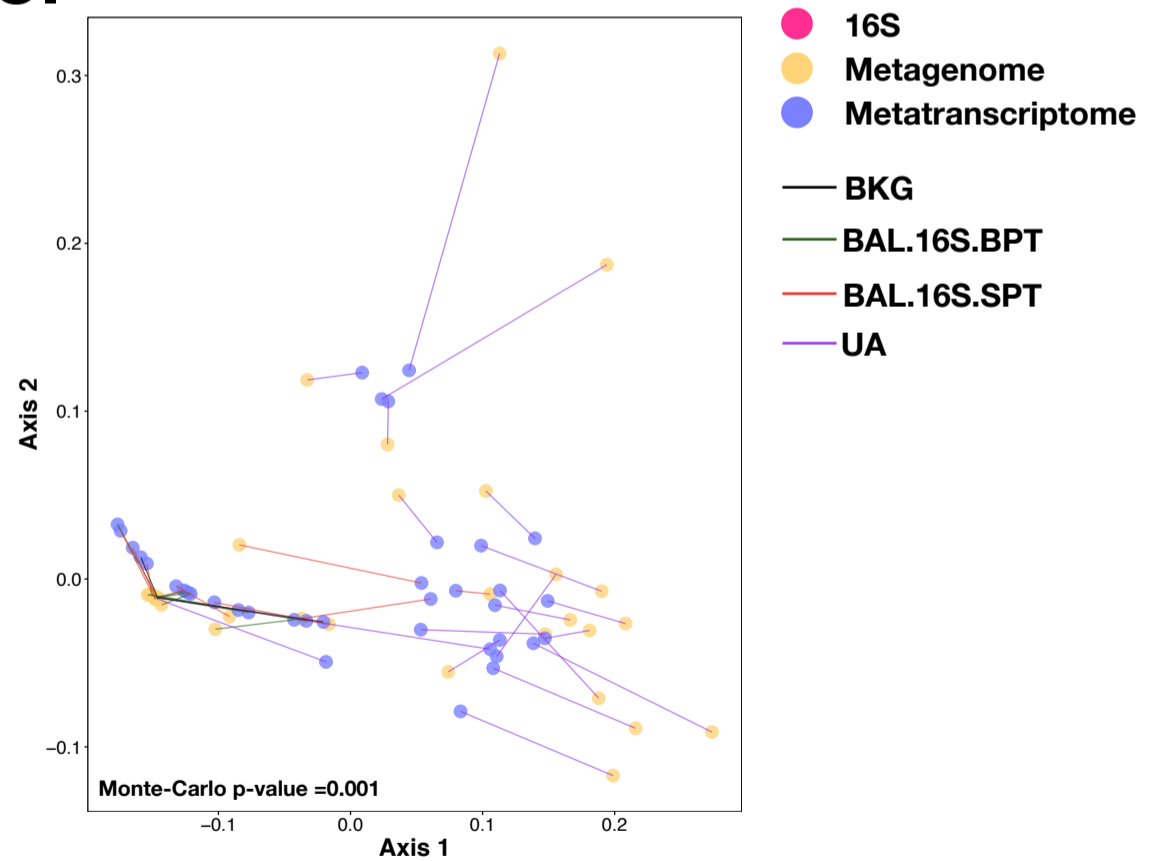

# SFigure 4

## Functional Annotation

### A. 16S vs. WGS

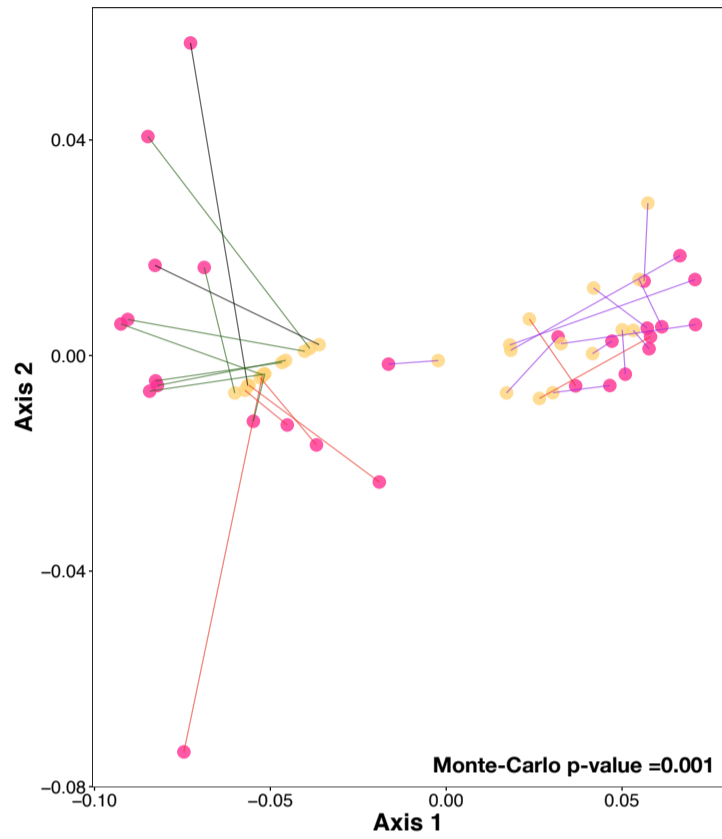

### B. 16S vs. RNA

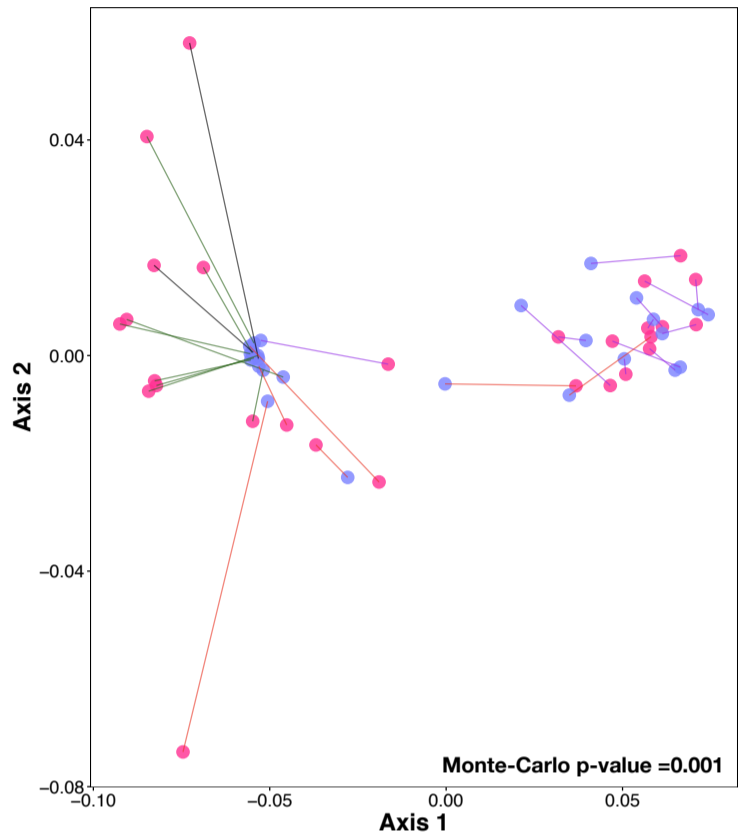

### C. WGS vs. RNA

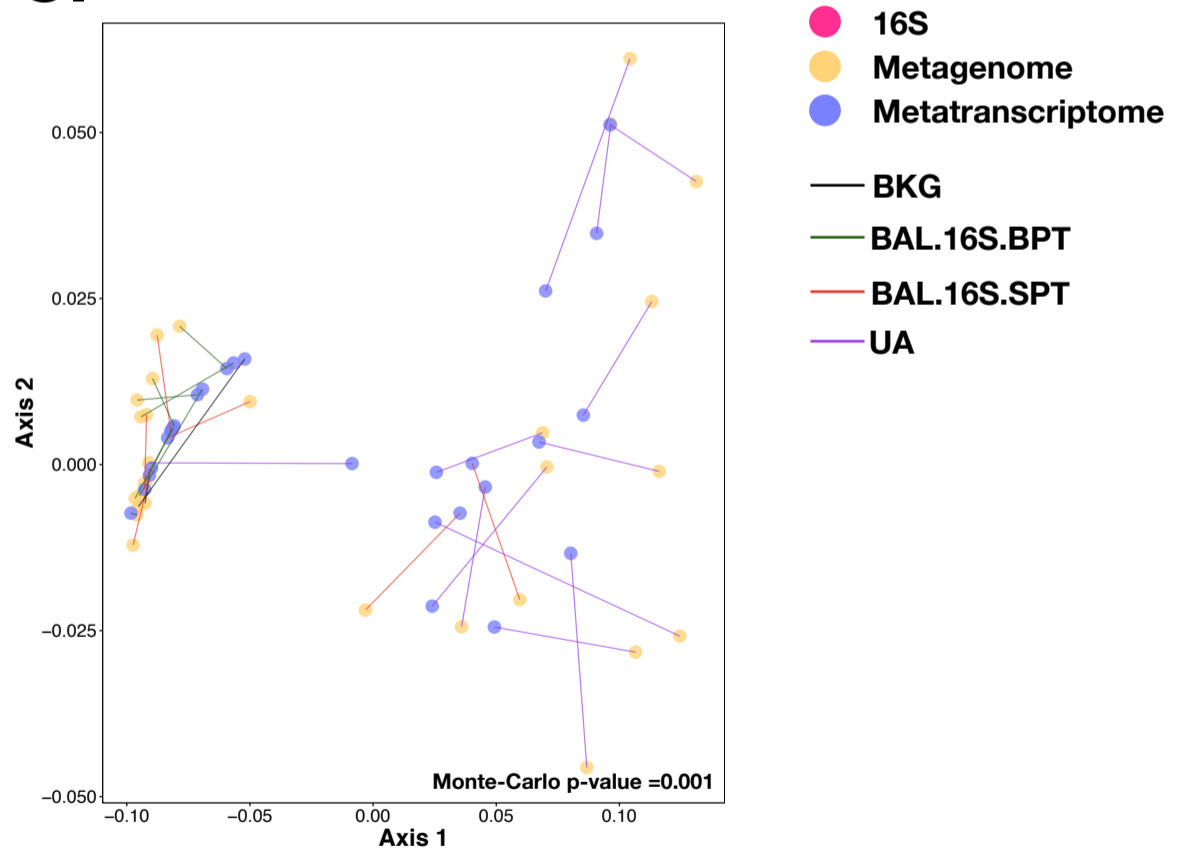

# SFigure 5

## A. WGS Metagenome

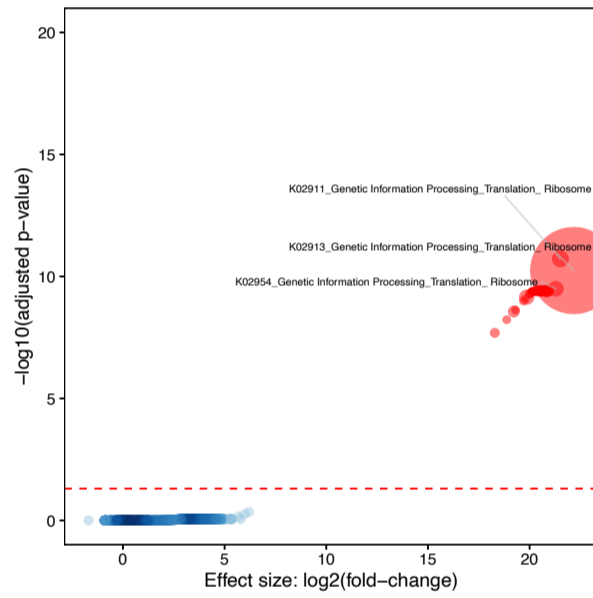

*Up Regulated in SPT*

## B. RNA Metatranscriptome

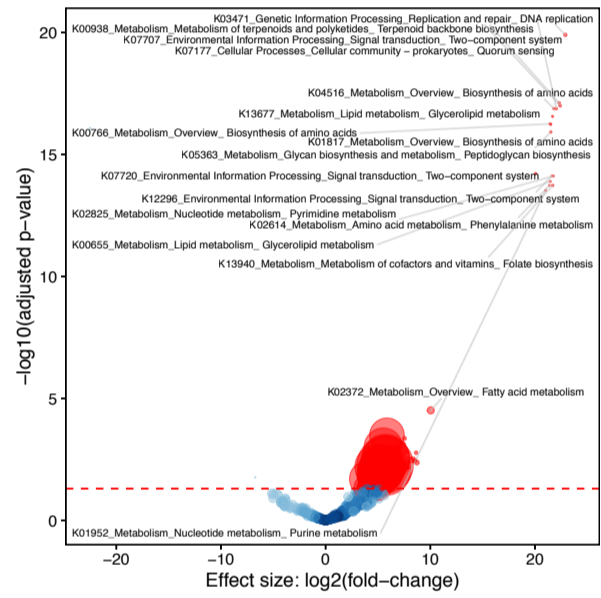

*Up Regulated in SPT*

# SFigure 6

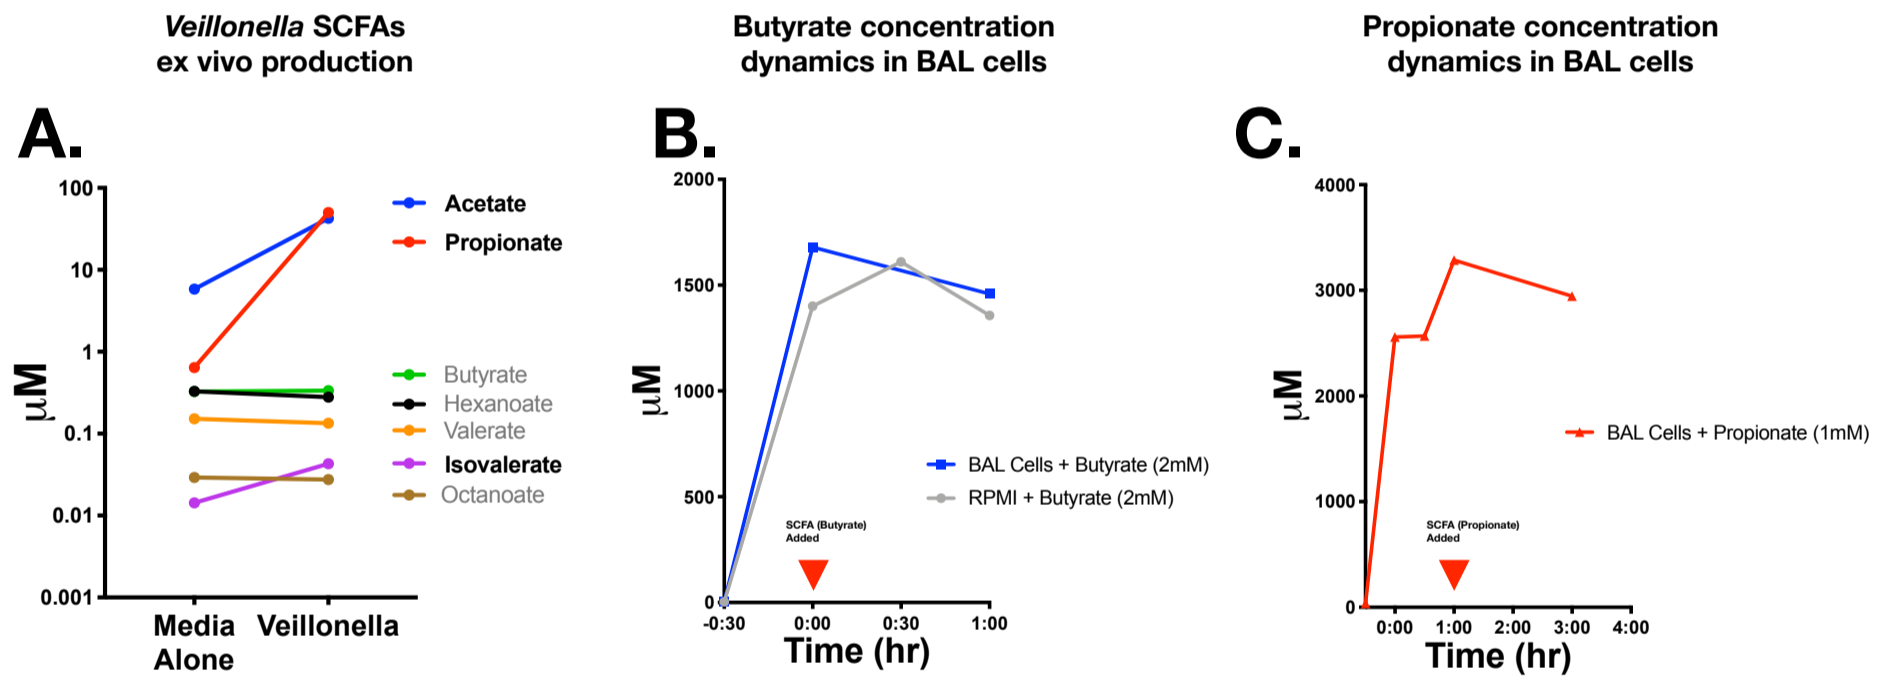

# SFigure 7

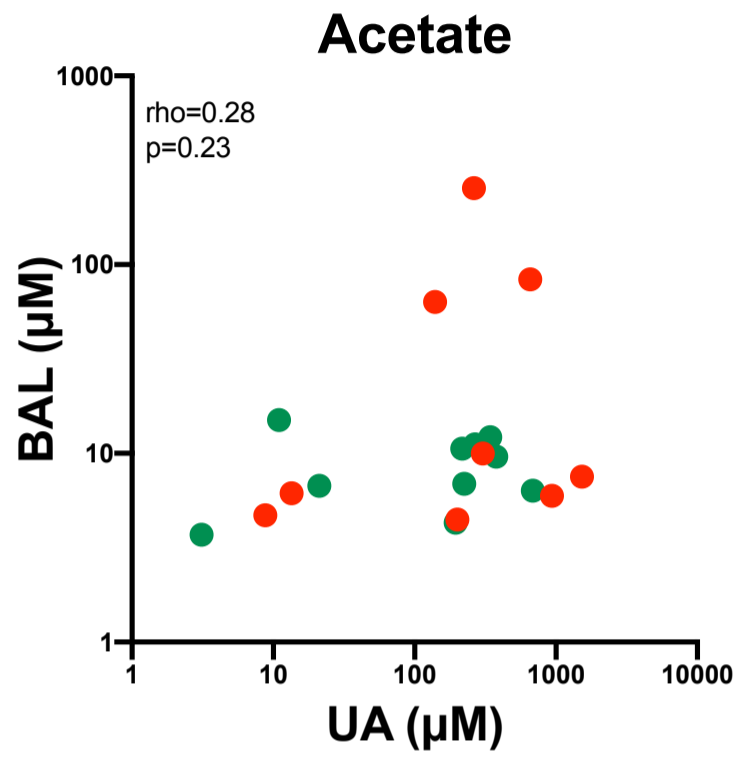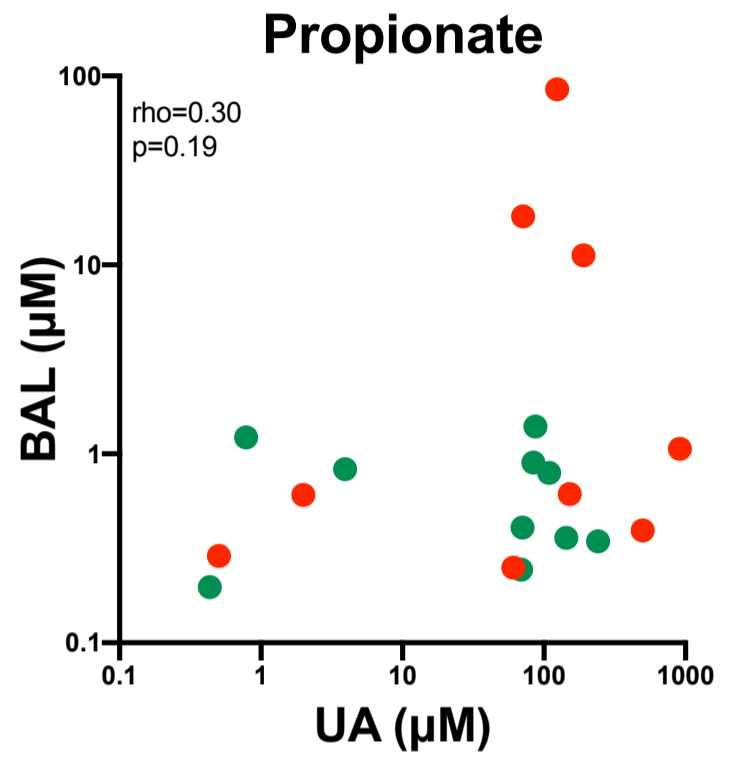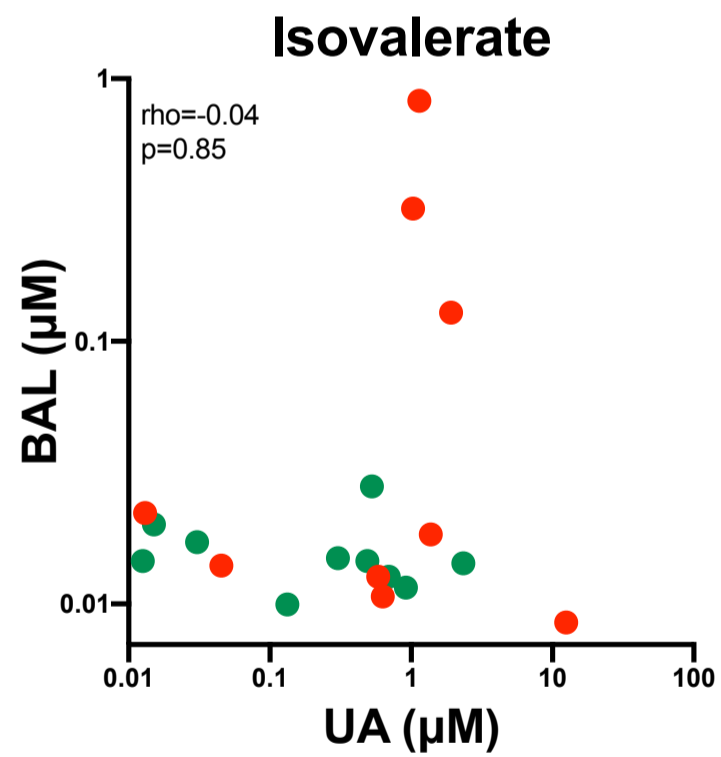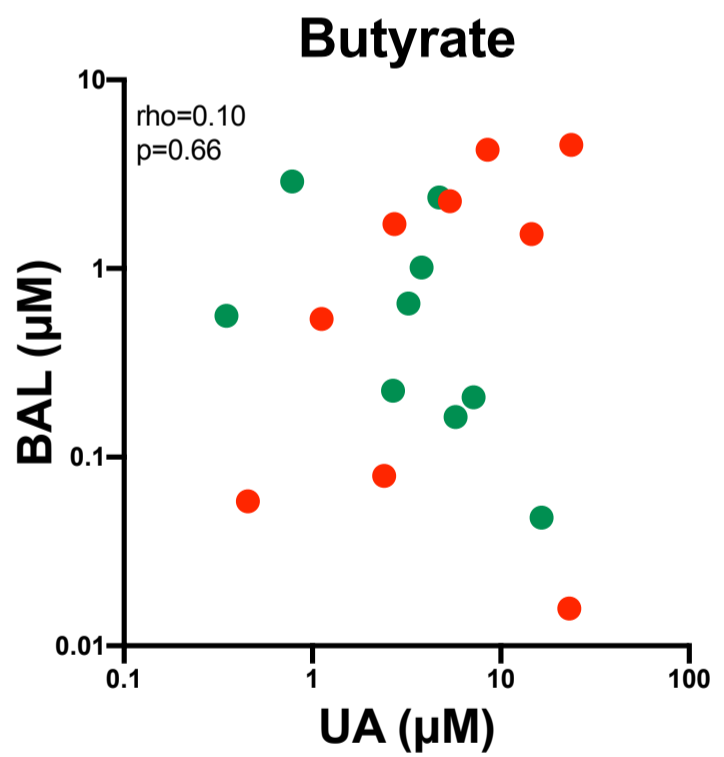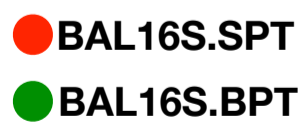

# SFigure 8

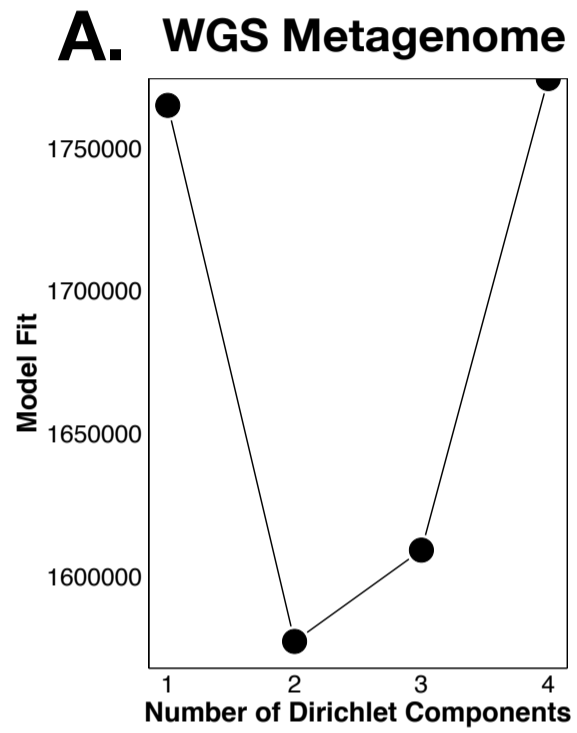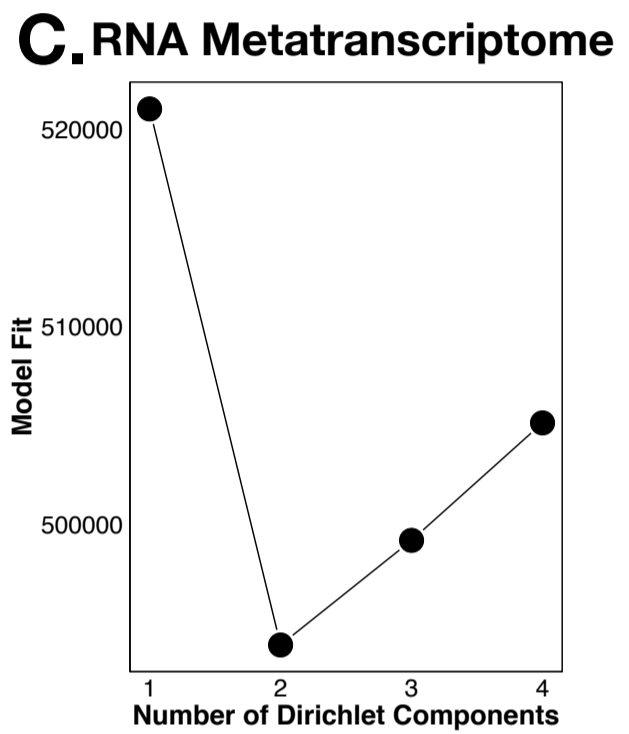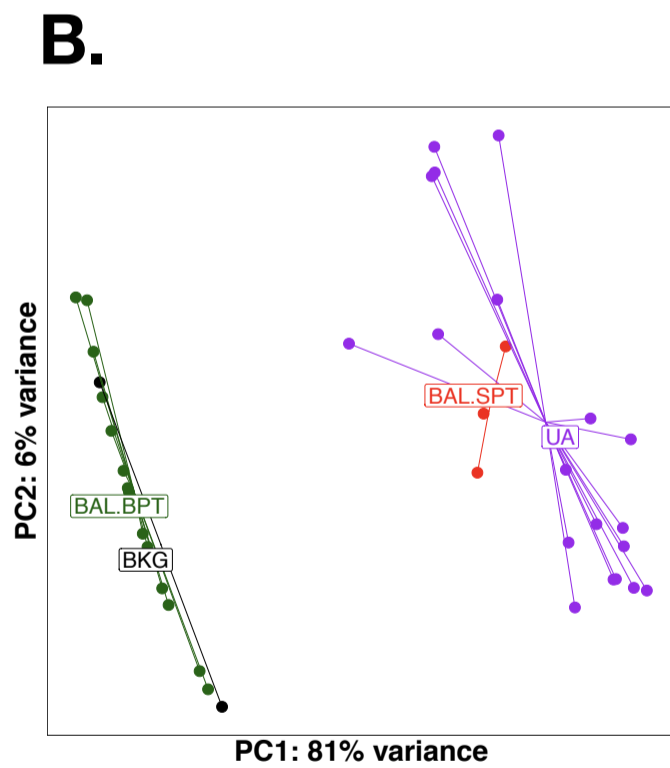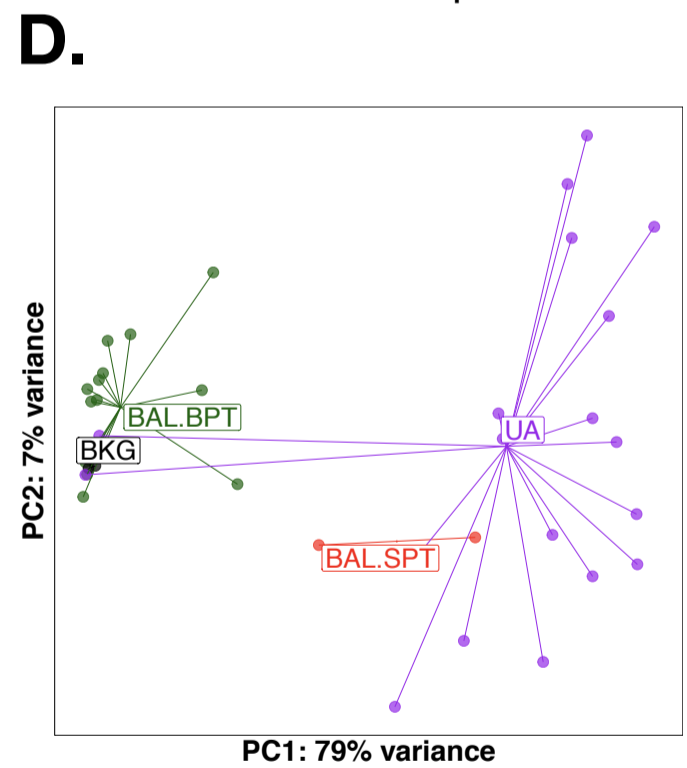



# SFigure 9

**A.**

**16S rRNA gene**

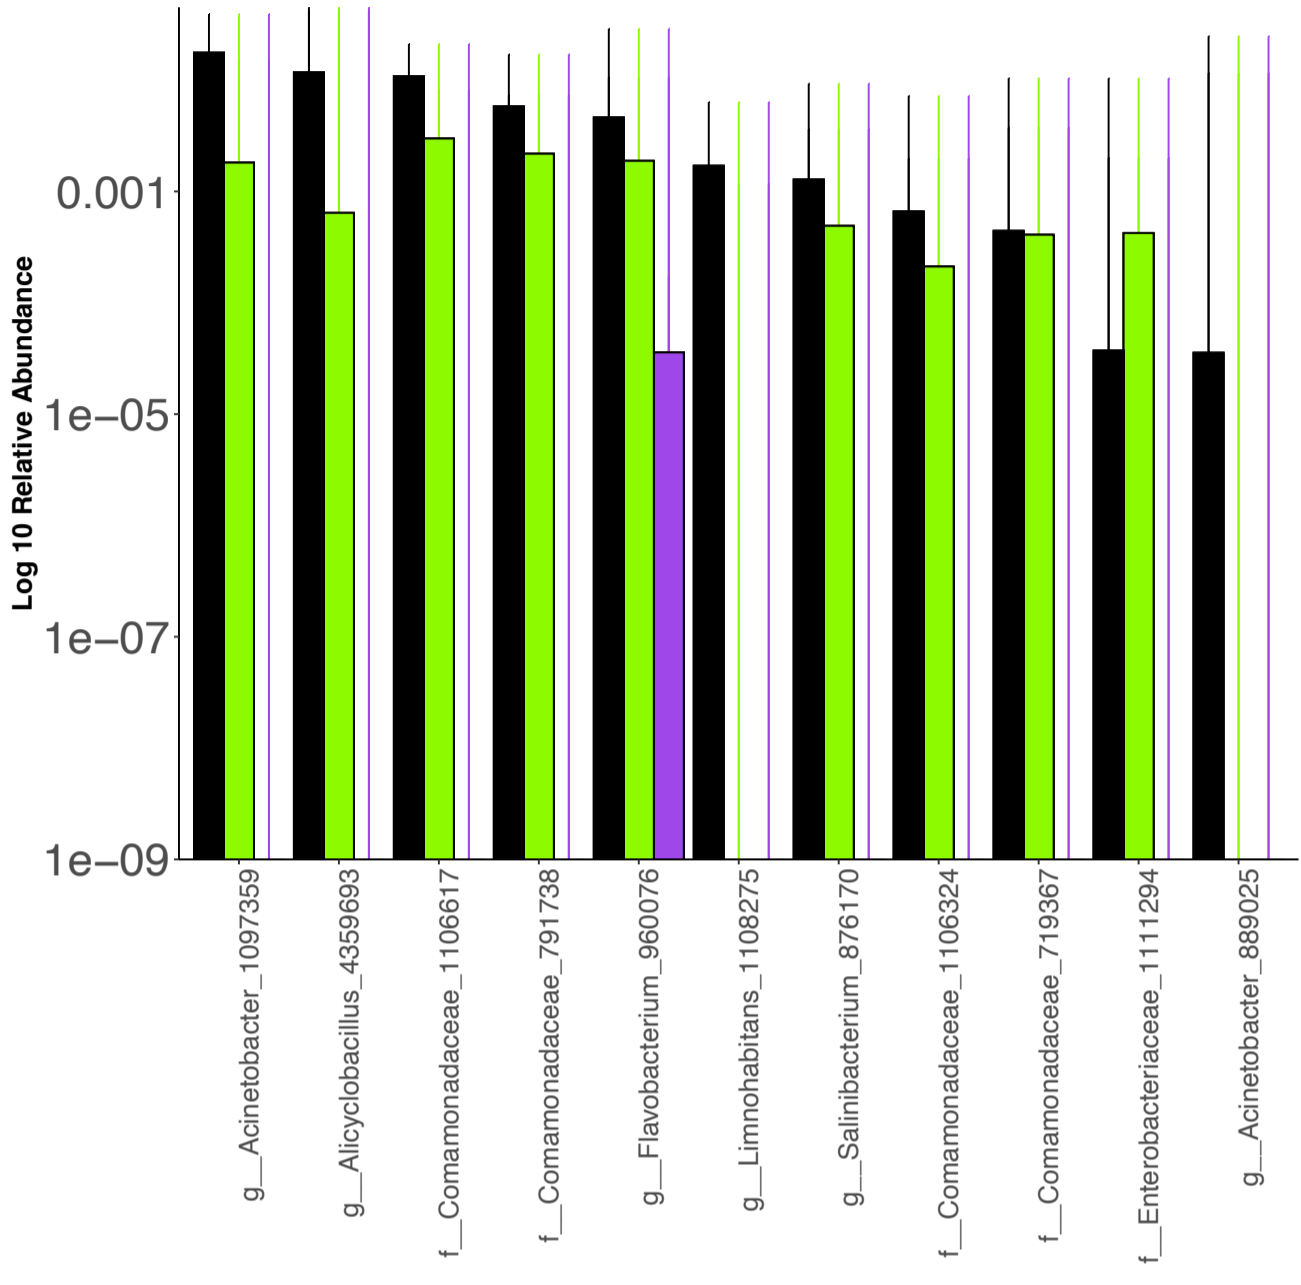

**B.**

**WGS Metagenome**

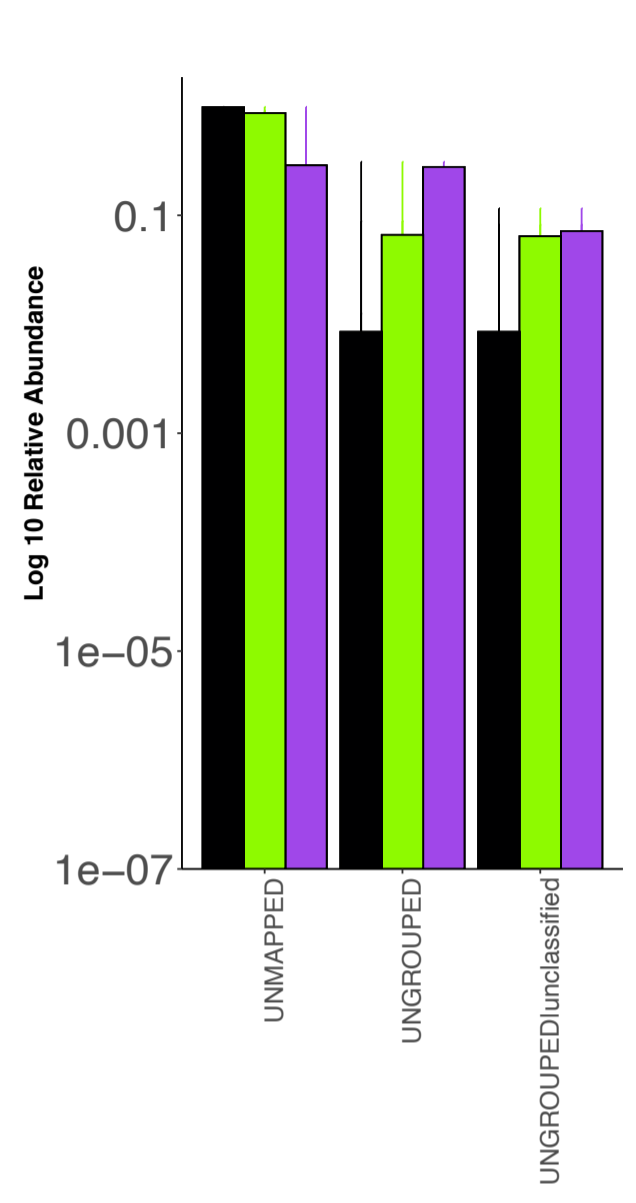

**C.**

**RNA Metatranscriptome**

**Legend:**  **BKG**  **UA**  **BAL**

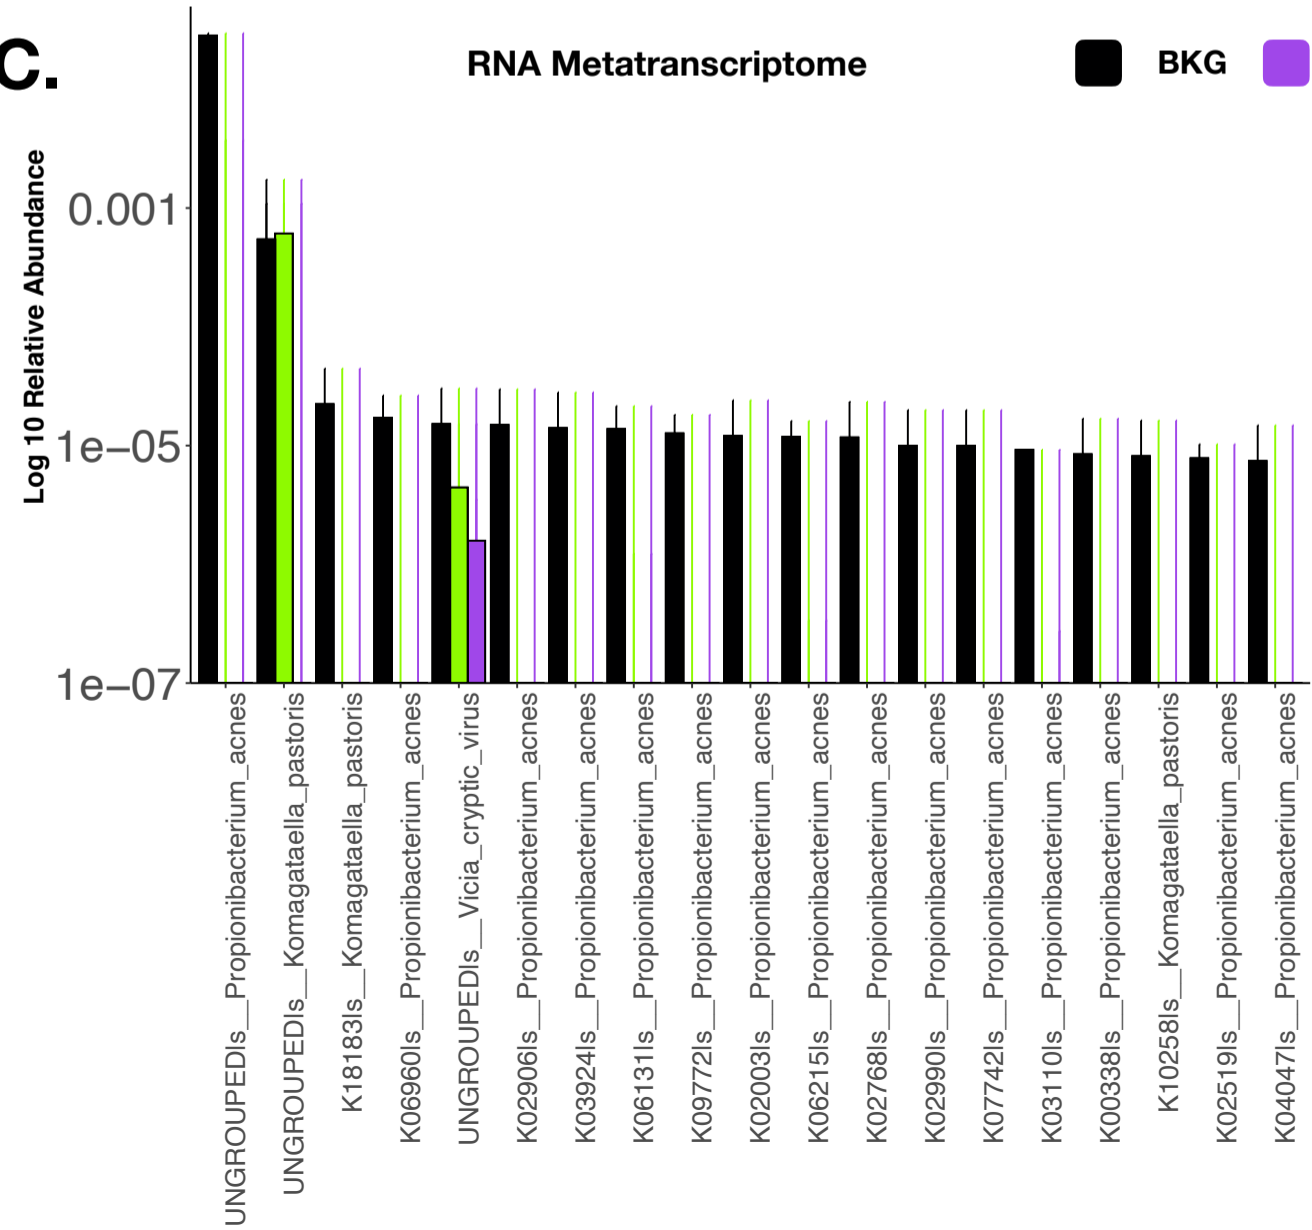

Supplement: NIHMS1687573-supplement-Supplementary_Figures.pdf [file NIHMS1687573-supplement-Supplementary_Figures.pdf]
